# Supplementary material for: Ergosterol Peroxide Isolated from Ganoderma lucidum Abolishes MicroRNA miR-378-Mediated Tumor Cells on Chemoresistance
Source: PubMed Central journal article supplement (PMC3431381; doi:10.1371/journal.pone.0044579), 2012-08-30
Supplement: pone.0044579.s001.pdf [file pone.0044579.s001.pdf]

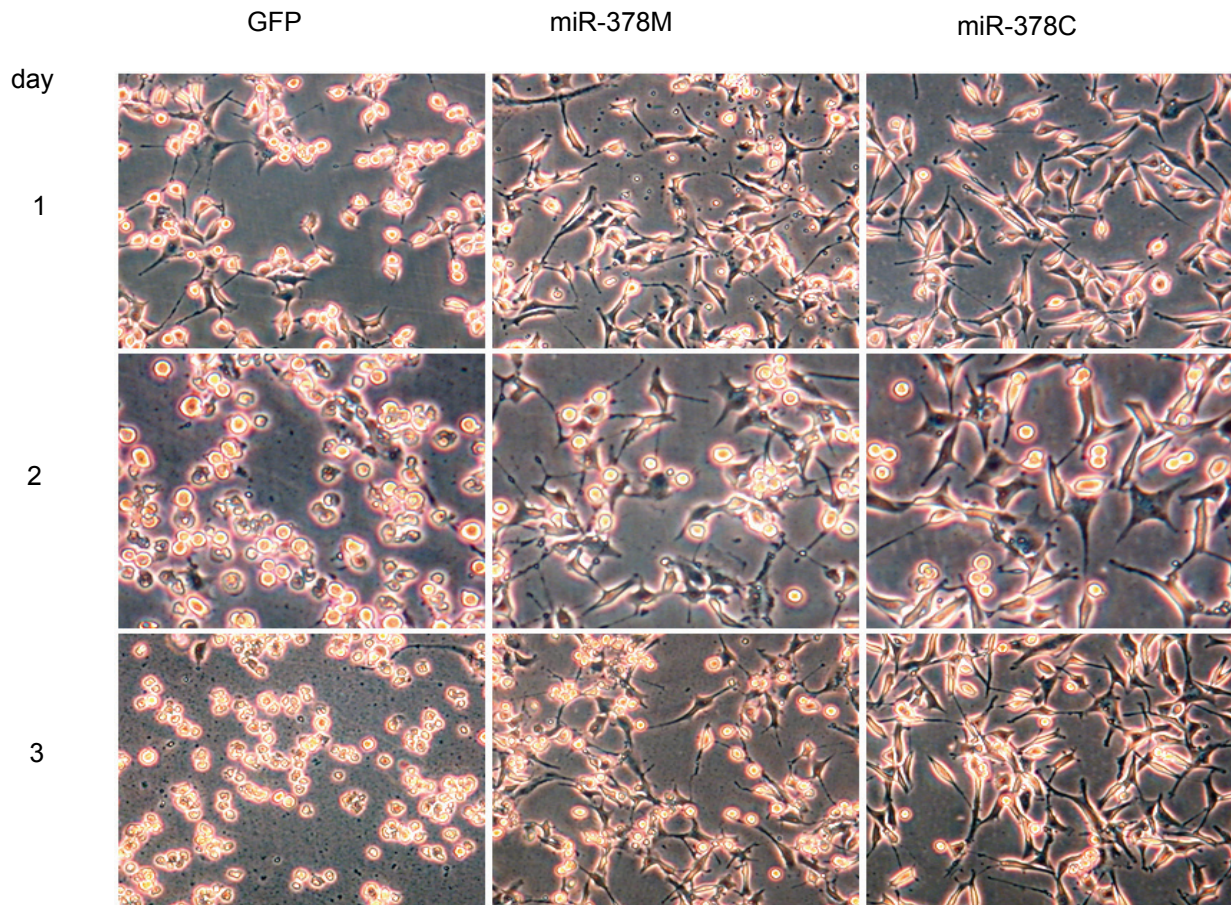

**Supplementary Figure S1. Cancer cells transfected with *miR-378* are C2-ceramide resistant.** miR378M, miR-378C, and GFP cells were cultured in normal medium containing 30  $\mu$ M C2-ceramide for different days as indicated. Cells expressing *miR-378* are resistant to C2-ceramide-induced cell death.
