# Supplementary material for: Ergosterol Peroxide Isolated from Ganoderma lucidum Abolishes MicroRNA miR-378-Mediated Tumor Cells on Chemoresistance
Source: PubMed Central journal article supplement (PMC3431381; doi:10.1371/journal.pone.0044579), 2012-08-30
Supplement: pone.0044579.s003.pdf [file pone.0044579.s003.pdf]

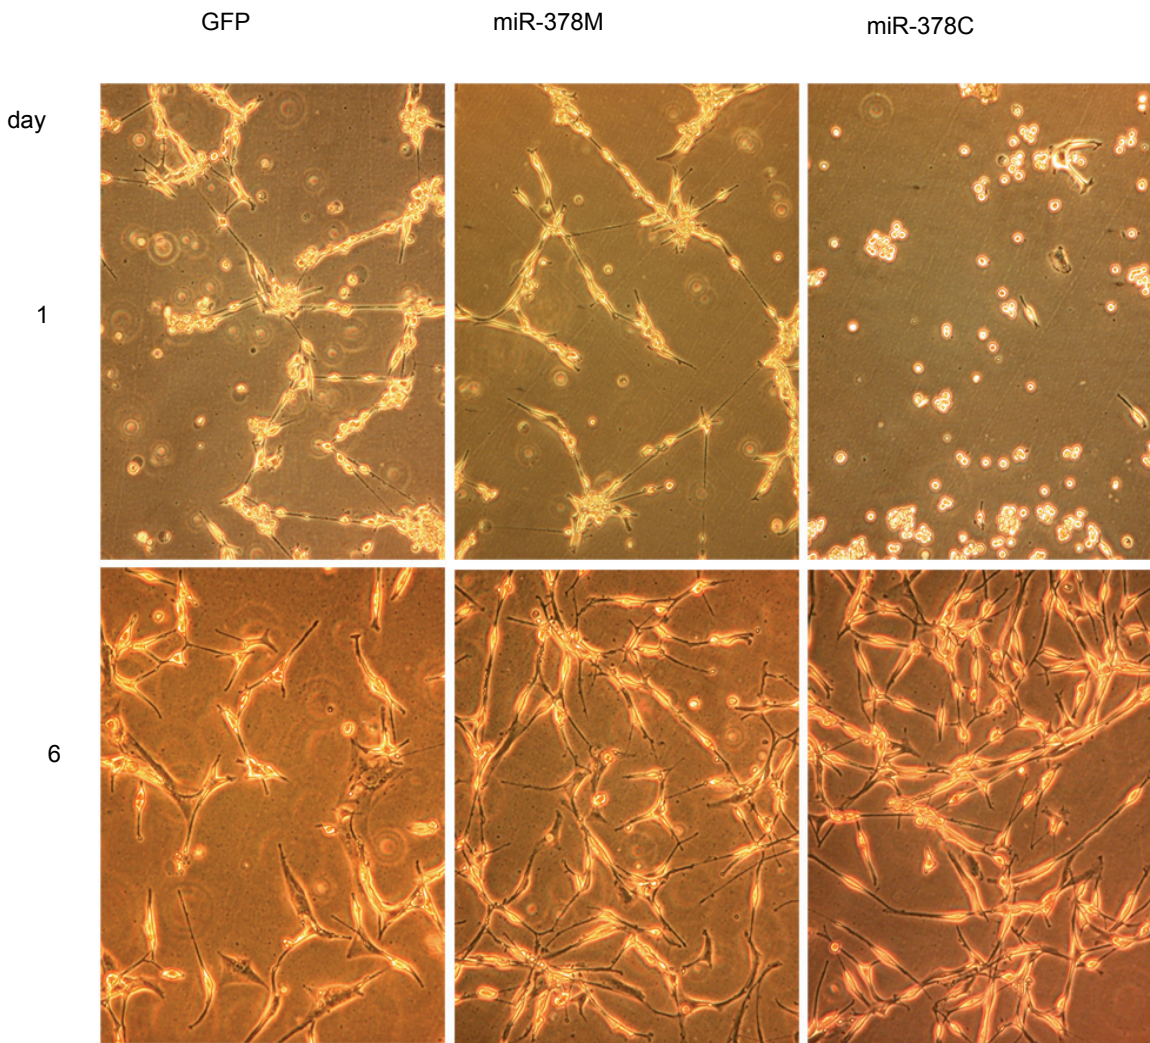

**Supplementary Figure S3. Cancer cells transfected with *miR-378* are resistant to Methotrexate.** The cells were also treated with Methotrexate at 22 mM for 6 days. Methotrexate induced cell elongation.
