# Supplementary material for: Ergosterol Peroxide Isolated from Ganoderma lucidum Abolishes MicroRNA miR-378-Mediated Tumor Cells on Chemoresistance
Source: PubMed Central journal article supplement (PMC3431381; doi:10.1371/journal.pone.0044579), 2012-08-30
Supplement: pone.0044579.s007.pdf [file pone.0044579.s007.pdf]

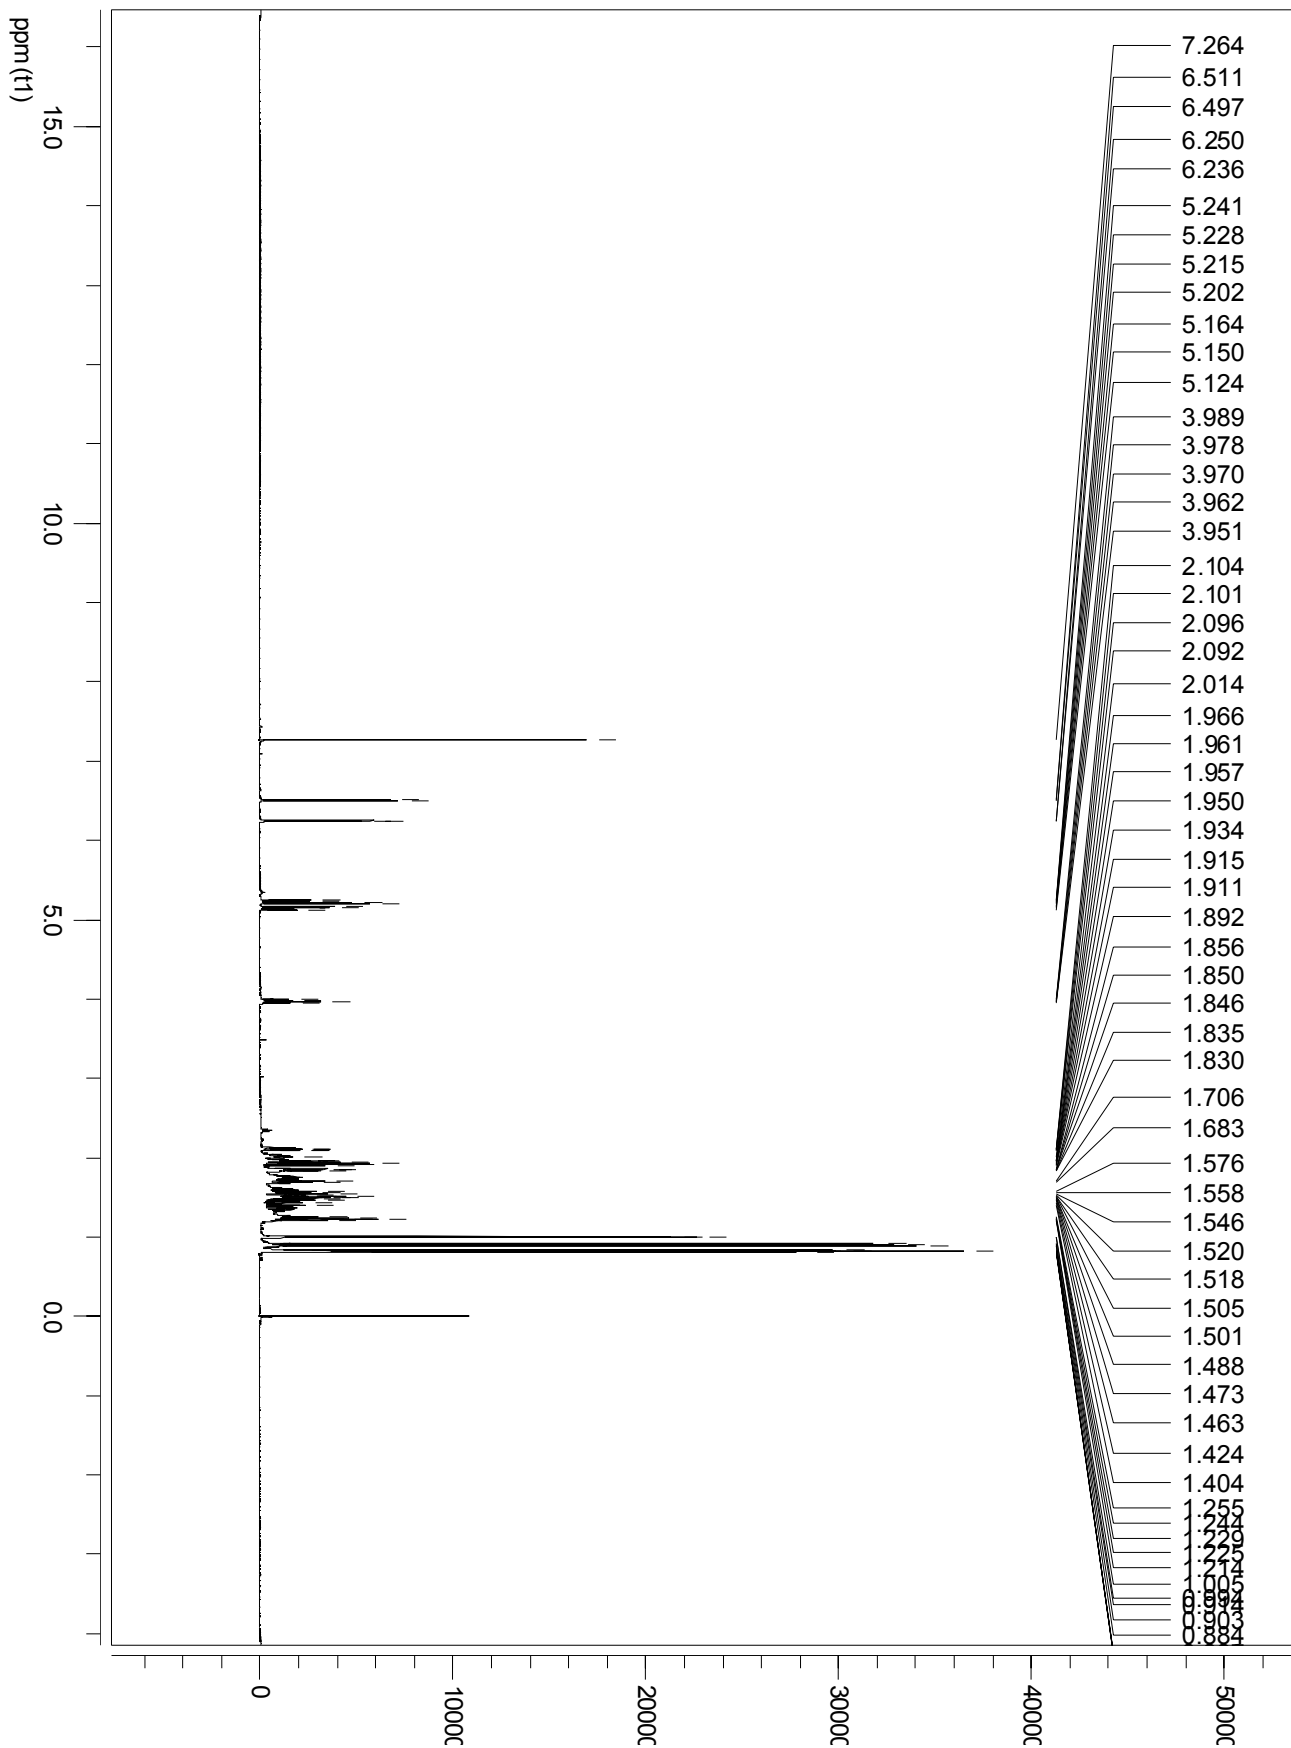

**Supplementary Figure S7. 1H-NMR analysis.** The diagram shows record at 600 MHz in CDCl<sub>3</sub>. The candidate GL421 was analyzed by 1H-NMR. The hydrogen-containing functional groups were identified by chemical shift of H. The 1H-NMR spectra of GL421 showed that there was one endo-double bond, one linear olefin, and one C3-OH in GL421, which are similar to sterols.
