# Supplementary material for: Ergosterol Peroxide Isolated from Ganoderma lucidum Abolishes MicroRNA miR-378-Mediated Tumor Cells on Chemoresistance
Source: PubMed Central journal article supplement (PMC3431381; doi:10.1371/journal.pone.0044579), 2012-08-30
Supplement: pone.0044579.s009.pdf [file pone.0044579.s009.pdf]

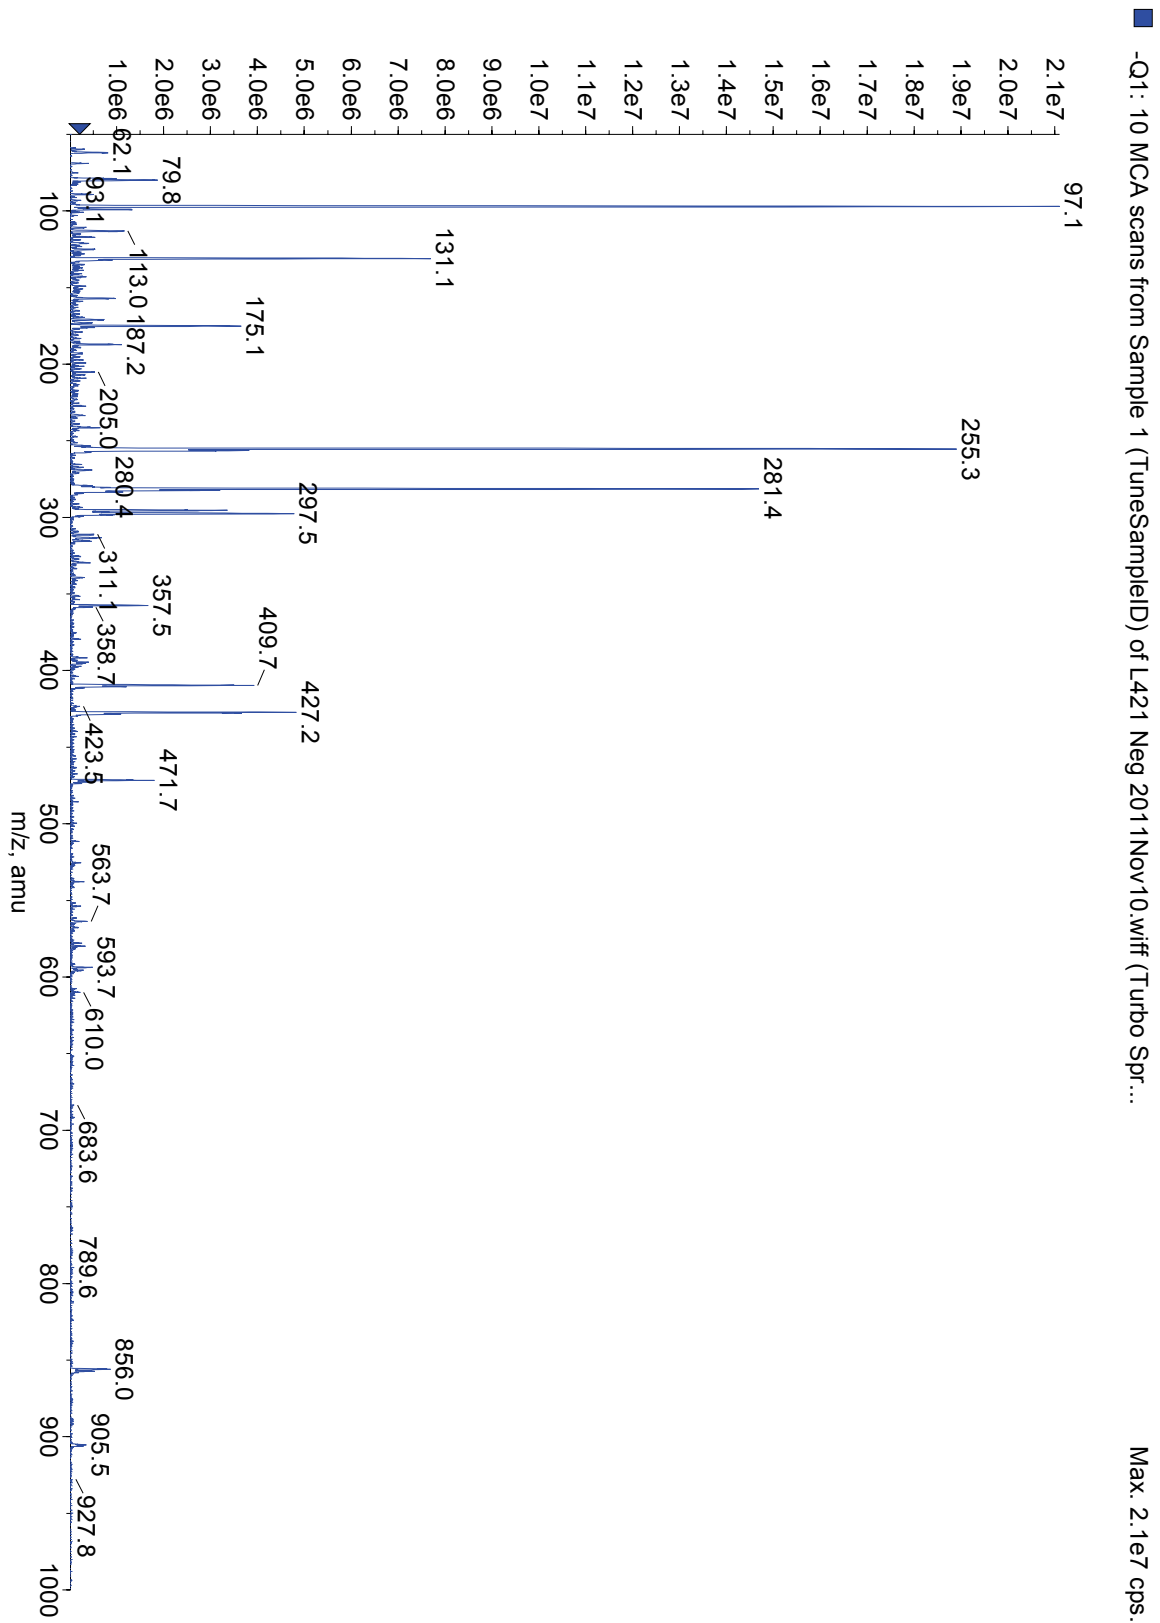

**Supplementary Figure S9. ESIMS [M/Z,427.2(M-H)-] analysis.** The candidate GL421 was assigned the molecular formula C<sub>28</sub>H<sub>44</sub>O<sub>3</sub> based on its ESIMS (electrospray ionization mass spectrometry) and m/z [(mass charge ratio, M/Z): 427.2 (M-1)-, 409.7 (M-H<sub>2</sub>O)-, 856.0 (2M-1)-].
