# Supplementary material for: Ergosterol Peroxide Isolated from Ganoderma lucidum Abolishes MicroRNA miR-378-Mediated Tumor Cells on Chemoresistance
Source: PubMed Central journal article supplement (PMC3431381; doi:10.1371/journal.pone.0044579), 2012-08-30
Supplement: pone.0044579.s010.pdf [file pone.0044579.s010.pdf]

**a**

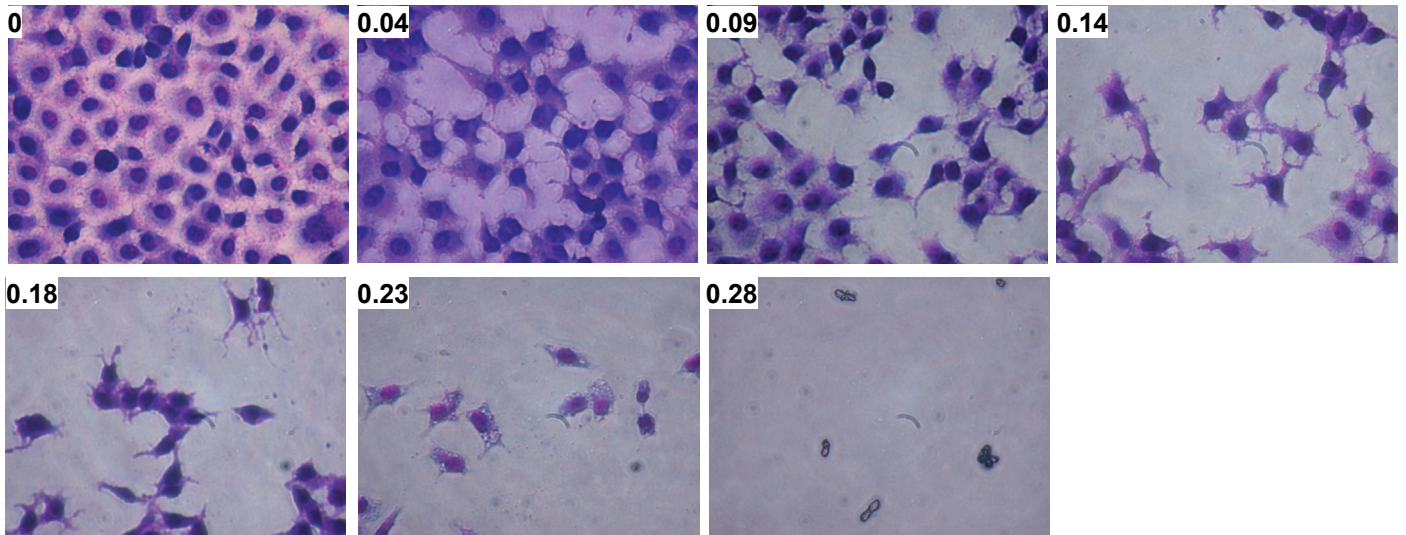

**b**

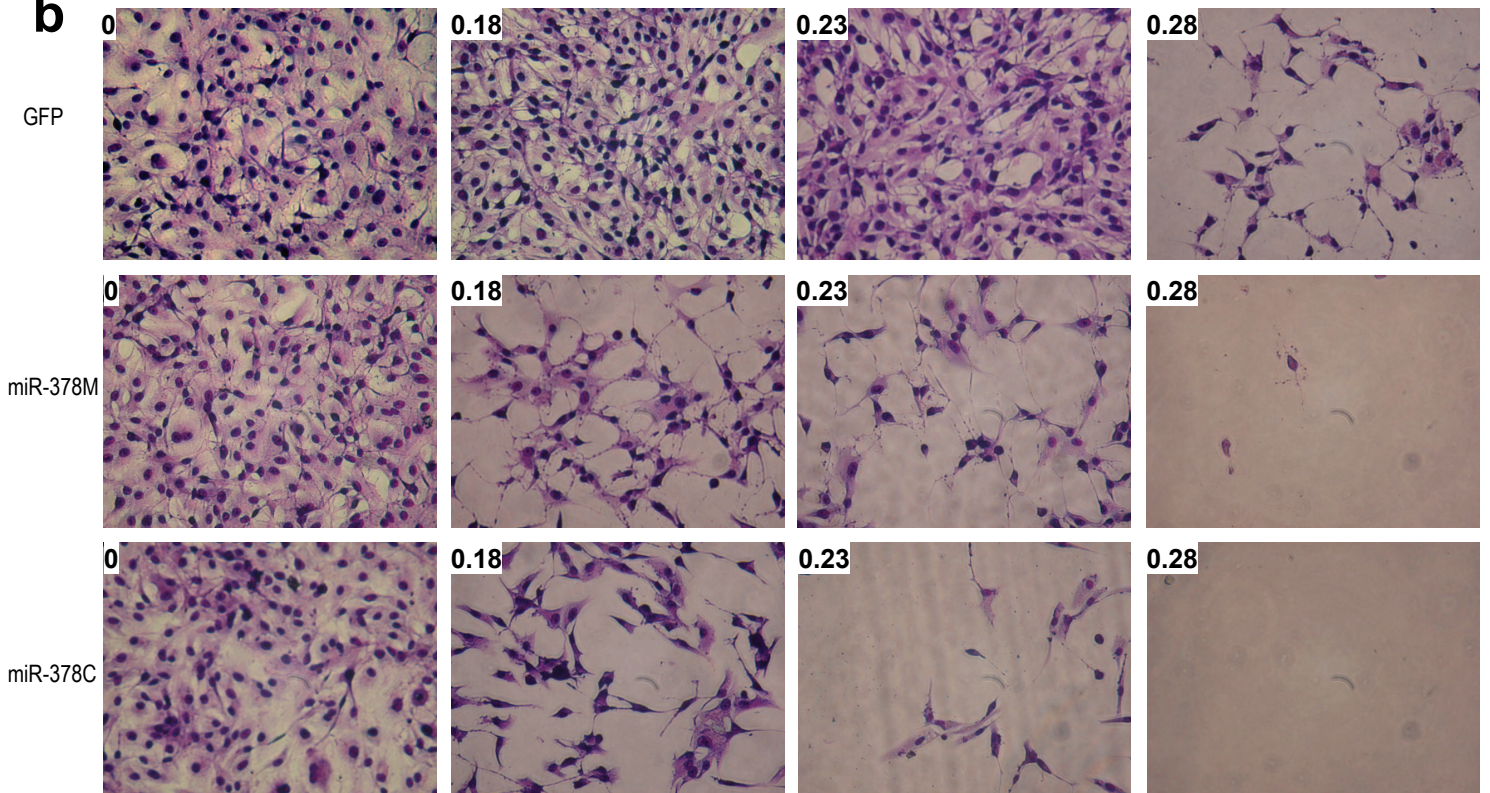

**Supplementary Figure S10. Effects of Ergosterol peroxide on tumor cell death.** (a) Breast carcinoma cells (MT1) were treated with ergosterol peroxide at different concentrations as indicated (mM). Induction of cancer cell death by ergosterol peroxide was concentration dependent. (b) GFP, miR-378M, and miR-378C cells were treated with ergosterol peroxide at the concentrations indicated. The sensitivities of cancer cells to ergosterol peroxide was miR-378C > miR-378M > GFP cell.
